# Supplementary material
Source: ML conference proceedings conference paper supplement (https://proceedings.neurips.cc/paper_files/paper/2019/hash/e345fac6bc5c868f0222430c733fa26e-Abstract.html)
Supplement: Supplementary file [file e345fac6bc5c868f0222430c733fa26e-Supplemental.zip]

## A Proof of Theorem 3.1

We denote  $[n] = \{1, 2, \dots, n\}$ ,  $\Pi_{i=1}^d W_i = W_1 W_2 \dots W_d$ , and  $\Pi_{i=d}^1 W_i = W_d W_{d-1} \dots W_1$ .  $\|x\|$  and  $\|A\|$  are the Euclidean vector norm and matrix operator norm.  $\bar{C}, C', c, c' > 0$  denote  $d$ -dependent constants that may change from instance to instance.

We adapt ideas of Hand and Voroninski (2017). Denote for simplicity  $G(x) = G(x, \theta_0)$  and  $f(x) = f_0(x)$ . Define

$$W_{i,+v} = \text{diag}(W_i v + b_i > 0) W_i, \quad b_{i,+v} = \text{diag}(W_i v + b_i > 0) b_i$$

where  $\text{diag}(w > 0)$  denotes a diagonal matrix with  $j$ th diagonal element  $\mathbb{1}\{w_j > 0\}$ . Then

$$\sigma(W_i v + b_i) = W_{i,+v} v + b_{i,+v}.$$

The analysis of Hand and Voroninski (2017) shows that the matrices

$$\tilde{W}_{i,+v} \equiv (W_{i,+v} \quad b_{i,+v}) \in \mathbb{R}^{n_i \times (n_{i-1}+1)}$$

satisfy a certain Weight Distribution Condition (WDC), yielding a deterministic approximation for  $\tilde{W}_{i,+v}^\top \tilde{W}_{i,+v'}$  and any  $v, v' \in \mathbb{R}^{n_{i-1}}$ . We will use the following consequence of this condition.

**Lemma A.1.** *Under the conditions of Theorem 3.1, with probability at least  $1 - C \sum_{i=1}^d n_i e^{-c\varepsilon^2 n_{i-1}}$ , the following hold for every  $i \in [d]$  and  $v, v' \in \mathbb{R}^{n_{i-1}}$ :*

$$(a) \quad \|W_{i,+v}\| \leq 2 \text{ and } \|b_{i,+v}\| \leq 2.$$

$$(b) \quad \|W_{i,+v}^\top W_{i,+v'} - \frac{1}{2} I\| \leq \varepsilon + \theta/\pi, \text{ where } \theta \text{ is the angle formed by } v \text{ and } v'.$$

$$(c) \quad \|W_{i,+v}^\top b_{i,+v}\| \leq \varepsilon.$$

*Proof.* For (a), note that  $\|W_i\| \leq 2$  and  $\|b_i\| \leq 2$  with probability  $1 - e^{-cn_i}$ , by a standard  $\chi^2$  tail-bound and operator norm bound for a Gaussian matrix. On the event that these hold, the bounds hold also for  $W_{i,+v}$  and  $b_{i,+v}$  and every  $v \in \mathbb{R}^{n_{i-1}}$ .

For (b) and (c), by (Hand and Voroninski, 2017, Lemma 11), with probability  $1 - 8n_i e^{-c\varepsilon^2 n_{i-1}}$  the matrix  $\tilde{W}_{i,+v}$  satisfies WDC with constant  $\varepsilon$  for every  $v$ . (The dependence of the constants  $c, \gamma$  in (Hand and Voroninski, 2017, Lemma 11) are given by  $c \gtrsim \varepsilon^{-2} \log \varepsilon^{-1}$  and  $\gamma \lesssim \varepsilon^2$  as indicated in the proof. This condition for  $c$  matches the growth rate of  $n_i$  specified in our Theorem 3.1.) From the form of  $Q$  in (Hand and Voroninski, 2017, Definition 2), the WDC implies

$$\left\| \tilde{W}_{i,+v}^\top \tilde{W}_{i,+v'} - \frac{1}{2} I \right\| \leq \varepsilon + \tilde{\theta}/\pi$$

where  $\tilde{\theta}$  is the angle between  $(v, 1)$  and  $(v', 1)$ . Noting that  $\tilde{\theta} \leq \theta$  and recalling the definition of  $\tilde{W}_{i,+v}$ , we get (b) and (c).  $\square$

For  $x \in \mathbb{R}^k$ , let  $x_0 = x$  and let  $x_i = \sigma(W_i \dots \sigma(W_1 x + b_1) \dots + b_i)$  be the output of the  $i$ th layer. Denote

$$W_{i,x} = W_{i,+x_{i-1}}, \quad b_{i,x} = b_{i,+x_{i-1}}.$$

Then also  $x_i = W_{i,x} x_{i-1} + b_{i,x}$ .

**Lemma A.2.** *Under the conditions of Theorem 3.1, with probability 1, the total number of distinct possible tuples  $(W_{1,x}, b_{1,x}, \dots, W_{d,x}, b_{d,x})$  satisfies*

$$|\{(W_{1,x}, b_{1,x}, \dots, W_{d,x}, b_{d,x}) : x \in \mathbb{R}^k\}| \leq 10^{d^2} (n_1 \dots n_d)^{d(k+1)}.$$

*Proof.* Let  $S = \mathbb{R}^{k+1}$ , which contains  $(x, 1)$ . Then the result of (Hand and Voroninski, 2017, Lemma 15) applied to the vector space  $S$  and to  $\tilde{W}_{1,x} = (W_{1,x} \quad b_{1,x})$  yields

$$|\{(W_{1,x}, b_{1,x} : x \in \mathbb{R}^k)\}| \leq 10n_1^{k+1}.$$

Each distinct  $(W_{1,x}, b_{1,x})$  defines an affine linear space of dimension  $k$  which contains the first layer output  $x_1$ , and hence a subspace  $S$  of dimension  $k + 1$  which contains  $(x_1, 1)$ . Applying (Hand and Voroninski, 2017, Lemma 15) to each such  $S$  and  $\tilde{W}_{2,x}$  yields

$$|\{(W_{2,x}, b_{2,x} : x \in \mathbb{R}^k)\}| \leq 10n_1^{k+1} \cdot 10n_2^{k+1}.$$

Proceeding inductively,

$$|\{(W_{i,x}, b_{i,x} : x \in \mathbb{R}^k)\}| \leq 10^i (n_1 \dots n_i)^{k+1},$$

which is analogous to (Hand and Voroninski, 2017, Lemma 16) in our setting with biases  $b_1, \dots, b_d$ . The result follows from taking the product over  $i = 1, \dots, d$ .  $\square$

**Lemma A.3.** Let  $A \in \mathbb{R}^{m \times n}$  have i.i.d.  $\mathcal{N}(0, 1/m)$  entries. Fix  $\varepsilon > 0$ , let  $k < n$ , and let  $V = \bigcup_{i=1}^M V_i$  and  $W = \bigcup_{j=1}^N W_j$  where  $V_i$  and  $W_j$  are subspaces of dimension at most  $k$ . Then with probability at least  $1 - MN(c/\varepsilon)^{2k} e^{-c'\varepsilon m}$ , for all  $x \in V$  and  $y \in W$  we have

$$|x^\top A^\top A y - x^\top y| \leq \varepsilon \|x\| \|y\|.$$

*Proof.* See (Hand and Voroninski, 2017, Lemma 14).  $\square$

Using these results, we analyze the gradient and critical points of  $f(x)$ . Note that with the above definitions,

$$\begin{aligned} G(x) &= V(W_{d,x} \dots (W_{1,x}x + b_{1,x}) \dots + b_{d,x}) \\ &= V\left(\prod_{i=d}^1 W_{i,x}\right)x + V\sum_{j=1}^d \left(\prod_{i=d}^{j+1} W_{i,x}\right)b_{j,x}. \end{aligned}$$

The function  $G(x)$  is piecewise linear in  $x$ , so  $f(x)$  is piecewise quadratic. If  $f(x)$  is differentiable at  $x$ , then the gradient of  $f$  can be written as

$$\nabla f(x) = \left(\prod_{i=1}^d W_{i,x}^\top\right) V^\top A^\top \left(AV\left(\prod_{i=d}^1 W_{i,x}\right)x + AV\sum_{j=1}^d \left(\prod_{i=d}^{j+1} W_{i,x}\right)b_{j,x} - Ay\right).$$

**Lemma A.4.** Define

$$g_x = 2^{-d}x - \left(\prod_{i=1}^d W_{i,x}^\top\right) V^\top y$$

Under the conditions of Theorem 3.1, we have with probability  $1 - C(e^{-c\varepsilon m} + e^{-c\varepsilon n} + \sum_i n_i e^{-c\varepsilon^2 n_{i-1}})$  that at every  $x \in \mathbb{R}^k$  where  $f$  is differentiable,

$$\|\nabla f(x) - g_x\| \leq C'\varepsilon(1 + \|x\| + \|y\|)$$

*Proof.* By Lemma A.2, for fixed  $\theta = (V, W_1, b_1, \dots, W_d, b_d)$ , the range  $\{V \prod_{i=d}^1 W_{i,x}x' : x, x' \in \mathbb{R}^k\}$  belongs to a union of at most  $C(n_1 \dots n_d)^{d(k+1)}$  subspaces of dimension  $k$ . For some  $C', c > 0$ , under the condition  $m \geq C'k(\varepsilon^{-1} \log \varepsilon^{-1}) \log(n_1 \dots n_d)$ , we have

$$C^2(n_1 \dots n_d)^{2d(k+1)}(c/\varepsilon)^{2k} e^{-c'\varepsilon m} \leq e^{-c\varepsilon m}.$$

Then for  $A \in \mathbb{R}^{m \times n}$  with i.i.d.  $\mathcal{N}(0, 1/m)$  entries, applying Lemma A.3 conditional on  $\theta$ , and then A.1(a) to bound  $\|W_{i,x}\|$  and  $\|V\|$ , we get

$$\left\|\left(\prod_{i=1}^d W_{i,x}^\top\right) V^\top (A^\top A - I) V \left(\prod_{i=d}^1 W_{i,x}\right) x\right\| \leq C\varepsilon \|x\|.$$

For  $A = I$ , this bound is trivial. The given conditions imply also

$$n \geq n_d \geq C'k(\varepsilon^{-1} \log \varepsilon^{-1}) \log(n_1 \dots n_d),$$

so applying the same argument with  $V$  in place of  $A$  yields

$$\left\| \left( \prod_{i=1}^d W_{i,x}^\top \right) (V^\top V - I) \left( \prod_{i=d}^1 W_{i,x} \right) x \right\| \leq C\varepsilon \|x\|.$$

Next, applying Lemma A.1(a–b) yields, for each  $j = d, d-1, \dots, 2, 1$ ,

$$\left\| \left( \prod_{i=1}^{j-1} W_{i,x}^\top \right) (W_{j,x}^\top W_{j,x} - I/2) \left( \prod_{i=j-1}^1 W_{i,x} \right) x \right\| \leq C\varepsilon \|x\|.$$

Combining these results, we get for the first term of  $\nabla f(x)$  that

$$\left\| \left( \prod_{i=1}^d W_{i,x}^\top \right) V^\top A^\top AV \left( \prod_{i=d}^1 W_{i,x} \right) x - 2^{-d} x \right\| \leq C\varepsilon \|x\|. \quad (3)$$

This holds with probability at least  $1 - e^{-c\varepsilon m} - e^{-c\varepsilon n} - C \sum_i n_i e^{-cn_i-1}$ .

The second term is controlled similarly: Lemma A.2 implies that for fixed parameters  $\theta$ , the set  $\{V \prod_{i=d}^{j+1} W_{i,x} b_{j,x} : x \in \mathbb{R}^k, j \in [d]\}$  is comprised of at most one of  $C(n_1 \dots n_d)^{d(k+1)}$  distinct vectors (which belong to subspaces of dimension 1.) Then applying Lemma A.3 twice to  $A$  and  $V$  as above, and using also  $\|b_{j,x}\| \leq 2$  from Lemma A.1(a),

$$\left\| \left( \prod_{i=1}^d W_{i,x}^\top \right) (V^\top A^\top AV - I) \left( \prod_{i=d}^{j+1} W_{i,x} \right) b_{j,x} \right\| \leq C\varepsilon.$$

Applying Lemma A.1(a–b) iteratively as above, we get

$$\left\| \left( \prod_{i=1}^j W_{i,x}^\top \right) \left[ \left( \prod_{i=j+1}^d W_{i,x}^\top \right) \left( \prod_{i=d}^{j+1} W_{i,x} \right) - 2^{-(d-j)} I \right] b_{j,x} \right\| \leq C\varepsilon.$$

Finally, Lemma A.1(a) and (c) yield

$$\left\| \left( \prod_{i=1}^j W_{i,x}^\top \right) b_{j,x} \right\| \leq C\varepsilon.$$

Combining these, we have for the second term of  $\nabla f(x)$  that

$$\left\| \sum_{j=1}^d \left( \prod_{i=1}^d W_{i,x}^\top \right) V^\top A^\top AV \left( \prod_{i=d}^{j+1} W_{i,x} \right) b_{j,x} \right\| \leq C\varepsilon \quad (4)$$

also with probability  $1 - e^{-c\varepsilon m} - e^{-c\varepsilon n} - C \sum_i n_i e^{-c\varepsilon^2 n_i-1}$ .

Finally, for the last term of  $\nabla f(x)$ , if  $A \neq I$  then we may apply Lemma A.3 again to get

$$\left\| \left( \prod_{i=1}^d W_{i,x}^\top \right) V^\top (A^\top A - I) y \right\| \leq C\varepsilon \|y\| \quad (5)$$

with probability  $1 - e^{-c\varepsilon m}$ . Combining (3), (4), and (5) concludes the proof.  $\square$

We now bound the second term of  $g_x$ .

**Lemma A.5.** *Under the conditions of Theorem 3.1, with probability  $1 - Cn_d e^{-c\varepsilon^4 n_d-1}$ , for every  $v \in \mathbb{R}^{n_d-1}$*

$$\|W_{d,+v}^\top V^\top y\| \leq C\varepsilon \|y\|.$$

*Proof.* Note that  $V^\top y \in \mathbb{R}^{n_d}$  has i.i.d.  $\mathcal{N}(0, \|y\|^2/n)$  entries. Then conditional on  $W_d$ , for each fixed  $v \in \mathbb{R}^{n_d-1}$ ,

$$u(v) \equiv W_{d,+v}^\top V^\top y \sim \mathcal{N}(0, \Sigma)$$

386 where

$$\Sigma = (\|y\|^2/n) \cdot W_{d,+,v}^\top W_{d,+,v} \in \mathbb{R}^{n_{d-1} \times n_{d-1}}.$$

387 On the event that Lemma A.1(b) holds, we have  $\|\Sigma\| \leq \|y\|^2/n$  and hence  $\|u(v)\|^2 \leq tn_{d-1}\|y\|^2/n$   
 388 with probability  $1 - e^{-cn_{d-1}t}$  for large  $t$ , by a  $\chi^2$  tail-bound. Noting that  $n \geq n_d \gg \varepsilon^{-2}n_{d-1}$  and  
 389 applying this bound for  $t = \varepsilon^2 n/n_{d-1}$ , we get  $\|u(v)\| \leq \varepsilon\|y\|$  with probability  $1 - e^{-c\varepsilon^2 n}$ .

390 We use a covering net argument to take a union bound over  $v$ : Let  $N$  be an  $\varepsilon^2$ -net of the  $n_{d-1}$ -sphere,  
 391 of cardinality  $|N| \leq (3/\varepsilon^2)^{n_{d-1}}$ . The above holds uniformly over  $v \in N$  with probability  $1 - e^{-c'\varepsilon^2 n}$ ,  
 392 because  $n \geq n_d \gg n_{d-1} \cdot \varepsilon^{-2} \log \varepsilon^{-1}$ . For any  $v'$  on the sphere and  $v \in N$  with  $\|v - v'\| < \varepsilon^2$ , the  
 393 angle  $\theta$  between  $v$  and  $v'$  is at most  $C\varepsilon^2$ . We have

$$\|u(v) - u(v')\| \leq \|W_{d,+,v}^\top - W_{d,+,v'}^\top\| \cdot \|V^\top y\|.$$

394 Suppose now that Lemma A.1(b) holds for  $W_d$  with the constant  $\varepsilon^2$ : This occurs with probability  
 395  $1 - 8n_d e^{-c\varepsilon^4 n_{d-1}}$ . Approximating each of the four terms in

$$(W_{d,+,v}^\top - W_{d,+,v'}^\top)(W_{d,+,v} - W_{d,+,v'})$$

396 by  $I/2$  on this event, we get

$$\|W_{d,+,v}^\top - W_{d,+,v'}^\top\|^2 = \|(W_{d,+,v}^\top - W_{d,+,v'}^\top)(W_{d,+,v} - W_{d,+,v'})\| \leq C'(\varepsilon^2 + \theta) \leq C\varepsilon^2.$$

397 Thus on this event,  $\|u(v) - u(v')\| \leq C\varepsilon\|V^\top y\|$ . By a  $\chi^2$  tail-bound, with probability  $1 - e^{-cn_d}$   
 398 we have  $\|V^\top y\|^2 \leq 2\|y\|^2 n_d/n \leq 2\|y\|^2$  and hence  $\|u(v) - u(v')\| \leq C\varepsilon\|y\|$ .  $\square$

399 *Proof of Theorem 3.1.* Combining Lemmas A.4, A.5, and A.1(a), with the stated probability,

$$\|\nabla f(x) - 2^{-d}x\| \leq C\varepsilon(1 + \|x\| + \|y\|)$$

400 for every  $x \in \mathbb{R}^k$ . Since  $G$  is piecewise linear, the directional derivative  $D_v f(x)$  always exists at any  
 401  $x \in \mathbb{R}^k$  for any unit vector  $v \in \mathbb{R}^k$ , even for  $x$  where  $f$  is non-differentiable. Set  $\tilde{x} = x/\|x\|$ . For any  
 402 fixed  $x$ , there exists a sequence  $\{x_n\}$  which converges to  $x$  and where  $f$  is differentiable, such that

$$D_{-\tilde{x}} f(x) = \lim_{n \rightarrow \infty} -\tilde{x}^\top \nabla f(x_n)$$

403 Since

$$-\tilde{x}^\top \nabla f(x_n) = -2^{-d}\tilde{x}^\top x_n + \tilde{x}^\top (2^{-d}x_n - \nabla f(x_n)) \leq -2^{-d}\tilde{x}^\top x_n + C\varepsilon(1 + \|x_n\| + \|y\|),$$

404 we get

$$\begin{aligned} D_{-\tilde{x}} f(x) &\leq \liminf_{n \rightarrow \infty} \left[ -2^{-d}\tilde{x}^\top x_n + C\varepsilon(1 + \|x_n\| + \|y\|) \right] \\ &= -2^{-d}\|x\| + C\varepsilon(1 + \|x\| + \|y\|). \end{aligned}$$

405 For  $\varepsilon > 0$  sufficiently small and  $C' > 0$  sufficiently large, this implies  $D_{-\tilde{x}} f(x) < 0$  whenever  
 406  $\|x\| \geq C'\varepsilon(1 + \|y\|)$ .  $\square$

## 407 B Comment on Projected-Gradient Surfing

408 The projected-gradient surfing algorithm performs an exhaustive search over pieces  $P_g \in$   
 409  $\mathcal{P}(x_{t-1}, \theta(\delta t), \tau)$ . The number of such pieces is at most  $1 + 2^{|S(x_{t-1}, \theta(\delta t), \tau)|}$ , where we recall  
 410 that

$$S(x, \theta, \tau) = \{(i, j) : |w_{i,j}^\top x_{i-1} + b_{i,j}| \leq \tau\}$$

411 is the collection of layers and rows where the sign could change during the next step.

412 We reason heuristically that if  $\theta \equiv \theta(\delta t)$  is “generic”, then for sufficiently small  $\tau$ , we should have  
 413  $|S(x, \theta, \tau)| \leq dk$  for all  $s \in [0, S]$  and  $x \in \mathbb{R}^k$ , so that this search is tractable for small  $k$ . Indeed,  
 414 for fixed  $W_1, b_1, \dots, W_i, b_i$ , the set of possible outputs  $\{x_i : x \in \mathbb{R}^k\}$  at the  $i^{\text{th}}$  layer is a finite  
 415 union of affine linear spaces of dimension  $k$ . For generic  $W_{i+1}$  and  $b_{i+1}$ , and every  $J \subset [n_i]$  where  
 416  $|J| = k + 1$ , each such space has empty intersection with the affine linear space

$$\{z \in \mathbb{R}^{n_i} : w_{i+1,j}^\top z + b_{i+1,j} = 0 \text{ for all } j \in J\}$$

417 of dimension  $n_i - k - 1$ . Thus

$$\sup_{x \in \mathbb{R}^k} |\{j \in [n_i] : w_{i+1,j}^\top x + b_{i+1,j} = 0\}| \leq k,$$

418 so  $\sup_{x \in \mathbb{R}^k} |S(x, \theta, 0)| \leq dk$  for  $\tau = 0$ . Then we expect this to hold also for some small  $\tau > 0$ .

## 419 C Additional Simulations

420 Here we give additional plots for experiments comparing surfing over a sequence of networks during  
 421 training to gradient descent over the final trained network. As described in the main text, we consider  
 422 the problem of minimizing the objective  $f(x) = \frac{1}{2} \|G(x) - G(x_*)\|^2$ , that is, recovering the image  
 423 generated from a trained network  $G(x) = G_{\theta_T}(x)$  with input  $x_*$ . We run surfing by taking a sequence  
 424 of parameters  $\theta_0, \theta_1, \dots, \theta_T$ , where  $\theta_0$  are the initial random parameters and the intermediate  $\theta_t$ 's are  
 425 taken every 40 training steps. In order to improve convergence speed we use Adam (Kingma and  
 426 Ba, 2014) to carry out gradient descent in each step in surfing. We also use Adam when optimizing  
 427 over the just the final network. We apply surfing and regular Adam for 300 trials, where in each  
 428 trial a randomly generated  $x_*$  and initial point  $x_{init}$  is chosen. Figure 5 shows the distribution of the  
 429 distance between the computed solution  $\hat{x}_T$  and the truth  $x_*$  for VAE, WGAN and WGAN-GP, using  
 430 surfing (red) and regular gradient descent with Adam (blue), over three different input dimensions  $k$ .

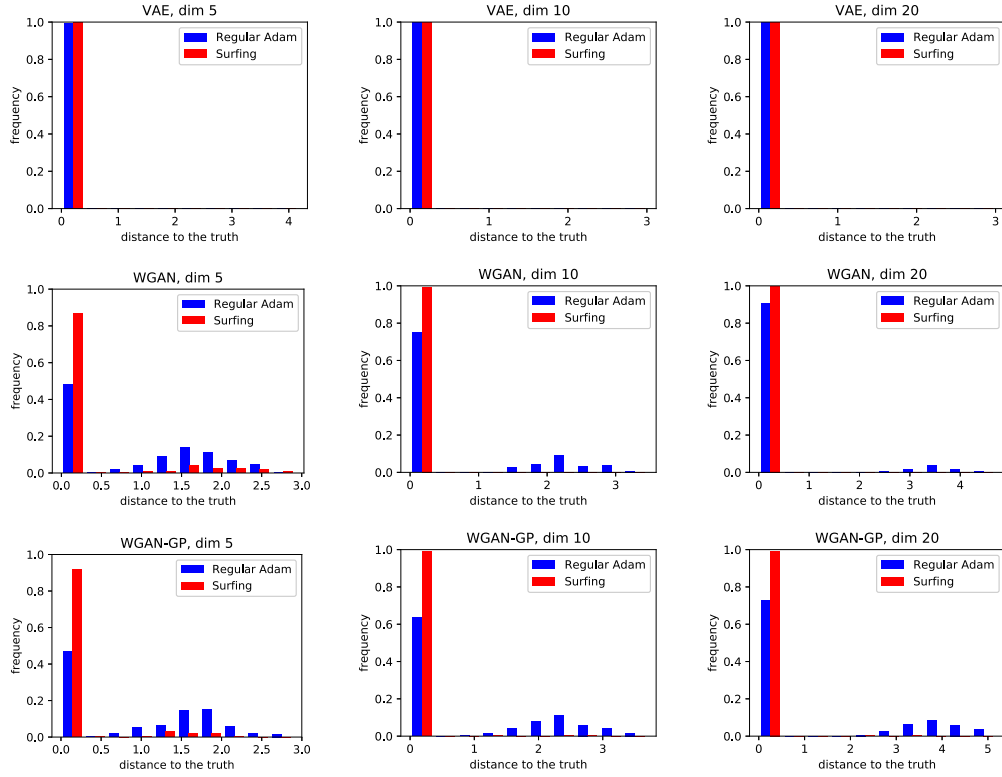

Figure 5: Distribution of the distance between solution  $\hat{x}_T$  and the truth  $x_*$  for VAE, WGAN and WGAN-GP, using surfing (red) and regular gradient descent with Adam (blue) over three different input dimensions  $k$ .
